MS ID#: MEDRXIV/2020/212613

MS TITLE: Epidemiology and Genetics of Preserved Ratio Impaired Spirometry (PRISm): An Analysis of UK Biobank

Daniel Higbee, Raquel Granell, George Davey-Smith, James W Dodd

The authors have withdrawn this manuscript version because the FEV1 percent predicted variable (UK biobank data field 20154) that was used was to determine spirometric pattern was constructed in only “healthy never smokers” or heavy smokers. This means the paper is affected by selection bias and is not generalizable. Therefore, the authors do not wish this work to be cited as reference for the project. If you have any questions, please contact the corresponding author.
